# Supplementary material for: c-Myb Binding Sites in Haematopoietic Chromatin Landscapes
Source: PubMed Central journal article supplement (PMC4514710; doi:10.1371/journal.pone.0133280), 2015-07-24
Supplement: pone.0133280.s012.pdf [file pone.0133280.s012.pdf]

**S1 Table. DNaseI footprints and c-Myb footprints for the six cells types analysed.**  
The total number of footprints, footprints overlapping with c-Myb motifs and predicted c-Myb footprints in all the six cell types analysed.

| Cell type | Total number of digital footprints | Reference | Digital DNase I footprints with c-Myb motifs inside | Total number of c-Myb footprints |
|-----------|------------------------------------|-----------|-----------------------------------------------------|----------------------------------|
| CD20+     | 603190                             | [1]       | 26809                                               | 6972                             |
| CD34+     | 902386                             | [1]       | 52767                                               | 12338                            |
| GM12865   | 811374                             | [1]       | 47676                                               | 10220                            |
| K562      | 498683                             | [1]       | 27060                                               | 6061                             |
| NB4       | 1049300                            | [1]       | 59086                                               | 12270                            |
| Th1       | 497983                             | [1]       | 27987                                               | 6581                             |

**Reference:**

1. Neph S, Vierstra J, Stergachis AB, Reynolds AP, Haugen E, et al. (2012) An expansive human regulatory lexicon encoded in transcription factor footprints. *Nature* 489: 83–90. doi:10.1038/nature11212.
