# Supplementary material for: c-Myb Binding Sites in Haematopoietic Chromatin Landscapes
Source: PubMed Central journal article supplement (PMC4514710; doi:10.1371/journal.pone.0133280), 2015-07-24
Supplement: pone.0133280.s013.pdf [file pone.0133280.s013.pdf]

**S2 Table. The ten most downregulated genes in K562 cells upon knockdown of c-Myb.** Gene name, ID number, degree of regulation, if the gene contains a c-Myb footprint and the position of the footprint for the ten most downregulated genes in K562 cells upon knockdown of c-Myb [1].

The promoter regions of the genes are defined as -2.5 kb upstream to +0.5 kb downstream of the TSS.

| #  | Gene Name | ENSG ID         | Regulation upon KD of c-Myb in K562 cells (log2) | c-Myb footprint | Position of c-Myb footprints |
|----|-----------|-----------------|--------------------------------------------------|-----------------|------------------------------|
| 1  | KCNH2     | ENSG00000055118 | -1.128                                           | Yes             | Intragenic and promoter      |
| 2  | LMO2      | ENSG00000135363 | -0.938                                           | Yes             | Intragenic and promoter      |
| 3  | DSG1      | ENSG00000134760 | -0.904                                           | No              | -                            |
| 4  | CTSH      | ENSG00000103811 | -0.722                                           | No              | -                            |
| 5  | MYB       | ENSG00000118513 | -0.670                                           | Yes             | Intragenic and promoter      |
| 6  | MYADM     | ENSG00000179820 | -0.631                                           | Yes             | Intragenic and promoter      |
| 7  | GLUL      | ENSG00000135821 | -0.586                                           | Yes             | 19 kb downstream of gene     |
| 8  | STMN3     | ENSG00000197457 | -0.582                                           | Yes             | Promoter                     |
| 9  | EPCAM     | ENSG00000119888 | -0.569                                           | Yes             | Intragenic                   |
| 10 | GRSF1     | ENSG00000132463 | -0.547                                           | Yes             | Promoter                     |

**Reference:**

1. Lorenzo PI, Brendeford EM, Gilfillan S, Gavrillov AA, Leedsak M, et al. (2011) Identification of c-Myb Target Genes in K562 Cells Reveals a Role for c-Myb as a Master Regulator. *Genes & Cancer*. doi:10.1177/1947601911428224.
