# Supplementary material for: c-Myb Binding Sites in Haematopoietic Chromatin Landscapes
Source: PubMed Central journal article supplement (PMC4514710; doi:10.1371/journal.pone.0133280), 2015-07-24
Supplement: pone.0133280.s014.pdf [file pone.0133280.s014.pdf]

**S3 Table. The ten most upregulated genes in K562 cells upon knockdown of c-Myb.** Gene name, ID number, degree of regulation, if the gene contains a c-Myb footprint and the position of the footprint for the ten most upregulated genes in K562 cells upon knockdown of c-Myb [1]. The promoter regions of the genes are defined as -2.5 kb upstream to +0.5 kb downstream of the TSS.

| #  | Gene Name | ENSG ID         | Regulation upon KD of c-Myb in K562 cells (log2) | c-Myb footprint | Position of c-Myb footprint |
|----|-----------|-----------------|--------------------------------------------------|-----------------|-----------------------------|
| 1  | GYPB      | ENSG00000250361 | 0.89                                             | No              | -                           |
| 2  | GDF15     | ENSG00000130513 | 0.86                                             | Yes             | Promoter                    |
| 3  | MKRN1     | ENSG00000133606 | 0.79                                             | Yes             | Promoter                    |
| 4  | SLC30A10  | ENSG00000196660 | 0.78                                             | Yes             | 15 kb upstream of TSS       |
| 5  | MRAP2     | ENSG00000135324 | 0.73                                             | Yes             | Intragenic                  |
| 6  | ALAS2     | ENSG00000158578 | 0.73                                             | No              | -                           |
| 7  | BNIP3L    | ENSG00000104765 | 0.72                                             | No              | -                           |
| 8  | LEPR      | ENSG00000213625 | 0.65                                             | Yes             | Promoter                    |
| 9  | CPEB4     | ENSG00000113742 | 0.65                                             | Yes             | Intragenic and promoter     |
| 10 | SH3BGRL3  | ENSG00000142669 | 0.62                                             | Yes             | 3 kb upstream of TSS        |

**Reference:**

1. Lorenzo PI, Brendeford EM, Gilfillan S, Gavrilov AA, Leedsak M, et al. (2011) Identification of c-Myb Target Genes in K562 Cells Reveals a Role for c-Myb as a Master Regulator. *Genes & Cancer*. doi:10.1177/1947601911428224.
