# Supplementary material for: c-Myb Binding Sites in Haematopoietic Chromatin Landscapes
Source: PubMed Central journal article supplement (PMC4514710; doi:10.1371/journal.pone.0133280), 2015-07-24
Supplement: pone.0133280.s015.pdf [file pone.0133280.s015.pdf]

**S4 Table. Genomic localisation for c-Myb footprints in the six cell types analysed.** FDR-corrected p values, p', and normalised ratio for the distribution of c-Myb footprints at annotated genes, promoters and intergenic regions for the six cell-types analysed.

| <b>CD20+ cells</b>   | <b>p'</b>             | <b>Normalised ratio</b> |
|----------------------|-----------------------|-------------------------|
| Intergenic regions   | 1.00                  | 0.95                    |
| UTRs                 | 0.52                  | 1.10                    |
| Exons                | $1.87 \times 10^{-3}$ | 3.07                    |
| Introns              | $8.86 \times 10^{-3}$ | 1.08                    |
| Promoters            | 1.00                  | 0.95                    |
| <b>CD34+ cells</b>   |                       |                         |
| Intergenic regions   | 1.00                  | 0.91                    |
| UTRs                 | 0.074                 | 1.17                    |
| Exons                | $1.87 \times 10^{-3}$ | 3.52                    |
| Introns              | 1.00                  | 0.98                    |
| Promoters            | 0.68                  | 1.00                    |
| <b>GM12865 cells</b> |                       |                         |
| Intergenic regions   | 1.00                  | 0.87                    |
| UTRs                 | 0.12                  | 1.15                    |
| Exons                | $1.67 \times 10^{-3}$ | 3.96                    |
| Introns              | 1.00                  | 0.95                    |
| Promoters            | $1.67 \times 10^{-3}$ | 1.04                    |
| <b>K562 cells</b>    |                       |                         |
| Intergenic regions   | 1.00                  | 0.85                    |
| UTRs                 | 0.043                 | 1.25                    |
| Exons                | $9.37 \times 10^{-4}$ | 3.47                    |
| Introns              | 1.00                  | 0.91                    |
| Promoters            | $9.37 \times 10^{-4}$ | 1.10                    |
| <b>NB4 cells</b>     |                       |                         |
| Intergenic regions   | 1.00                  | 0.83                    |
| UTRs                 | 0.12                  | 1.13                    |
| Exons                | $9.37 \times 10^{-4}$ | 3.93                    |
| Introns              | 1.00                  | 0.92                    |
| Promoters            | $9.37 \times 10^{-4}$ | 1.08                    |
| <b>Th1 cells</b>     |                       |                         |
| Intergenic regions   | 1.00                  | 0.95                    |
| UTRs                 | $2.25 \times 10^{-3}$ | 1.44                    |
| Exons                | $1.87 \times 10^{-3}$ | 2.98                    |
| Introns              | 0.069                 | 1.06                    |
| Promoters            | 1.00                  | 0.95                    |
