# Supplementary material for: c-Myb Binding Sites in Haematopoietic Chromatin Landscapes
Source: PubMed Central journal article supplement (PMC4514710; doi:10.1371/journal.pone.0133280), 2015-07-24
Supplement: pone.0133280.s016.pdf [file pone.0133280.s016.pdf]

**S5 Table. Additional c-Myb target genes used in this study.** Additional genes used in the study that are also regulated in K562 cells upon knockdown of c-Myb [1].

The promoter regions of the genes are defined as -2.5 kb upstream to +0.5 kb downstream of the TSS.

| # | Gene Name | ENSG ID         | Regulation upon KD of c-Myb in K562 cells (log2) | c-Myb footprint | Position of c-Myb footprints |
|---|-----------|-----------------|--------------------------------------------------|-----------------|------------------------------|
| 1 | BHLHE40   | ENSG00000134107 | 0.410                                            | Yes             | Promoter                     |
| 2 | DCAF7     | ENSG00000136485 | -0.229                                           | Yes             | Promoter                     |
| 3 | DUS3L     | ENSG00000141994 | -0.275                                           | Yes             | 11 kb upstream of TSS        |
| 4 | RABEPK    | ENSG00000136933 | -0.225                                           | Yes             | Promoter                     |
| 5 | IKZF1     | ENSG00000185811 | -0.221                                           | Yes             | Intragenic                   |
| 6 | SENPI     | ENSG00000079387 | -0.169                                           | Yes             | Promoter                     |

**Reference:**

1. Lorenzo PI, Brendeford EM, Gilfillan S, Gavrillov AA, Leedsak M, et al. (2011) Identification of c-Myb Target Genes in K562 Cells Reveals a Role for c-Myb as a Master Regulator. *Genes & Cancer*. doi:10.1177/1947601911428224.
