# Supplementary material for: c-Myb Binding Sites in Haematopoietic Chromatin Landscapes
Source: PubMed Central journal article supplement (PMC4514710; doi:10.1371/journal.pone.0133280), 2015-07-24
Supplement: pone.0133280.s017.pdf [file pone.0133280.s017.pdf]

**S6 Table. Co-localisation between c-Myb footprints and histone modifications.** FDR-corrected p values , p', and normalised ratios for co-localization between c-Myb footprints and ChIP-Seq peaks for the four histone modifications analysed in K562 cells.

| <b>Histone Modification</b> | <b>p'</b>              | <b>Normalised ratio</b> |
|-----------------------------|------------------------|-------------------------|
| H3K4me3                     | 4.00 x10 <sup>-4</sup> | 1.10                    |
| H3K4me1                     | 4.00 x10 <sup>-4</sup> | 0.81                    |
| H3K9ac                      | 0.31                   | 1.01                    |
| H3K27me3                    | 0.31                   | 0.80                    |
