# Supplementary material for: c-Myb Binding Sites in Haematopoietic Chromatin Landscapes
Source: PubMed Central journal article supplement (PMC4514710; doi:10.1371/journal.pone.0133280), 2015-07-24
Supplement: pone.0133280.s018.pdf [file pone.0133280.s018.pdf]

**S7 Table. Co-regulatory transcription factors.** Transcription factors with ChIP-seq peaks significantly overlapping c-Myb footprints at positively and negatively c-Myb-regulated genes. FDR-adjusted p-values, p', and normalised ratios are shown.

For full list of ChIP-seq datasets analysed see S10 Table.

| Protein name           | Genes with ChIP-Seq peak |          |       | Overlap with positively regulated genes |                  | Overlap with negatively regulated genes |                  |
|------------------------|--------------------------|----------|-------|-----------------------------------------|------------------|-----------------------------------------|------------------|
|                        | Positive                 | Negative | Total | p'                                      | Normalised ratio | p'                                      | Normalised ratio |
| <b>Positive subset</b> |                          |          |       |                                         |                  |                                         |                  |
| SAP30                  | 25                       | 17       | 42    | $9.33 \times 10^{-04}$                  | 3.10             | 0.05                                    | 1.63             |
| SIN3A                  | 23                       | 16       | 39    | $9.33 \times 10^{-04}$                  | 2.50             | 0.19                                    | 1.32             |
| MXI1                   | 24                       | 17       | 41    | $9.33 \times 10^{-04}$                  | 2.41             | 0.21                                    | 1.29             |
| ETS1                   | 26                       | 20       | 46    | $9.33 \times 10^{-04}$                  | 2.34             | 0.08                                    | 1.41             |
| ELK1                   | 11                       | 11       | 22    | $1.57 \times 10^{-02}$                  | 2.33             | 0.05                                    | 1.76             |
| SIX5                   | 12                       | 9        | 21    | $2.37 \times 10^{-02}$                  | 2.23             | 0.13                                    | 1.54             |
| E2F4                   | 20                       | 18       | 38    | $2.04 \times 10^{-03}$                  | 2.00             | 0.21                                    | 1.29             |
| PHF8                   | 35                       | 29       | 64    | $9.33 \times 10^{-04}$                  | 1.93             | 0.04                                    | 1.38             |
| RBBP5                  | 25                       | 21       | 46    | $9.48 \times 10^{-03}$                  | 1.67             | 0.59                                    | 1.03             |
| <b>Negative subset</b> |                          |          |       |                                         |                  |                                         |                  |
| THAP1                  | 6                        | 14       | 20    | 0.33                                    | 1.379            | $1.53 \times 10^{-03}$                  | 2.81             |
