# Supplementary material for: c-Myb Binding Sites in Haematopoietic Chromatin Landscapes
Source: PubMed Central journal article supplement (PMC4514710; doi:10.1371/journal.pone.0133280), 2015-07-24
Supplement: pone.0133280.s019.pdf [file pone.0133280.s019.pdf]

**S8 Table: Genes enriched in the GO terms of c-Myb footprints common in all six cell-types.** Gene list enriched in the four GO-terms (Fig. 5B) identified by GREAT for c-Myb footprints common in all the six cell-types analysed in this study. The promoter regions of the genes are defined as -2.5 kb upstream to +0.5 kb downstream of the TSS.

| #  | Gene name | Location of c-Myb footprint relative to gene | ENSG ID         |
|----|-----------|----------------------------------------------|-----------------|
| 1  | ADAT2     | Promoter                                     | ENSG00000189007 |
| 2  | APEX1     | Promoter                                     | ENSG00000100823 |
| 3  | APLP1     | +0.2 kb                                      | ENSG00000105290 |
| 4  | BRCA1     | Promoter                                     | ENSG00000012048 |
| 5  | C22orf28  | Promoter                                     | ENSG00000100220 |
| 6  | CASC3     | Promoter                                     | ENSG00000108349 |
| 7  | CDKL3     | +21 kb                                       | ENSG00000006837 |
| 8  | CLP1      | Promoter                                     | ENSG00000172409 |
| 9  | CWC27     | Promoter                                     | ENSG00000153015 |
| 10 | DCAF13    | Promoter                                     | ENSG00000164934 |
| 11 | DCP1B     | Promoter                                     | ENSG00000151065 |
| 12 | DDX23     | Promoter                                     | ENSG00000174243 |
| 13 | DDX41     | Promoter                                     | ENSG00000183258 |
| 14 | ERCC1     | Intragenic                                   | ENSG00000012061 |
| 15 | EXOSC5    | Promoter                                     | ENSG00000077348 |
| 16 | FBL       | -35 kb                                       | ENSG00000105202 |
| 17 | FDXACB1   | Promoter                                     | ENSG00000255561 |
| 18 | GRSF1     | Promoter                                     | ENSG00000132463 |
| 19 | HNRNPA0   | Promoter                                     | ENSG00000177733 |
| 20 | HNRNPA1   | Promoter                                     | ENSG00000135486 |
| 21 | HNRNPA3   | +40 kb                                       | ENSG00000170144 |
| 22 | HNRNPUL1  | Promoter                                     | ENSG00000105323 |
| 23 | HSD17B10  | -250 kb                                      | ENSG00000072506 |
| 24 | INTS7     | Promoter                                     | ENSG00000143493 |
| 25 | KIN       | Promoter                                     | ENSG00000151657 |
| 26 | KLHDC3    | Promoter                                     | ENSG00000124702 |
| 27 | LSM4      | -5 kb                                        | ENSG00000130520 |
| 28 | MBNL1     | Promoter                                     | ENSG00000152601 |
| 29 | MDC1      | Promoter                                     | ENSG00000137337 |
| 30 | MUS81     | Promoter                                     | ENSG00000172732 |
| 31 | NONO      | Promoter                                     | ENSG00000147140 |
| 32 | OSGEP     | Promoter                                     | ENSG00000092094 |
| 33 | PCBP1     | -16 kb                                       | ENSG00000169564 |
| 34 | POLD4     | Promoter                                     | ENSG00000175482 |
| 35 | POLR2A    | Promoter                                     | ENSG00000181222 |
| 36 | POLR2L    | Promoter                                     | ENSG00000177700 |

**S8 Table continued.**

|    |             |            |                 |
|----|-------------|------------|-----------------|
| 37 | POP5        | Promoter   | ENSG00000167272 |
| 38 | PPAN-P2RY11 | Promoter   | ENSG00000243207 |
| 39 | PPIA        | Promoter   | ENSG00000196262 |
| 40 | PSMB4       | +42 kb     | ENSG00000159377 |
| 41 | PSME2       | Promoter   | ENSG00000100911 |
| 42 | PTBP1       | Promoter   | ENSG00000011304 |
| 43 | RAD21       | Promoter   | ENSG00000164754 |
| 44 | RBM14       | Promoter   | ENSG00000239306 |
| 45 | RBM6        | Promoter   | ENSG00000004534 |
| 46 | RBPJ        | Promoter   | ENSG00000168214 |
| 47 | RFC5        | Promoter   | ENSG00000111445 |
| 48 | RNMT        | Promoter   | ENSG00000101654 |
| 49 | RPL26       | Promoter   | ENSG00000161970 |
| 50 | RPL37A      | Promoter   | ENSG00000197756 |
| 51 | RPL9        | -65 kb     | ENSG00000237550 |
| 52 | RPS28       | +20 kb     | ENSG00000233927 |
| 53 | RPS29       | Promoter   | ENSG00000213741 |
| 54 | RPS8        | Promoter   | ENSG00000142937 |
| 55 | RUVBL2      | Promoter   | ENSG00000183207 |
| 56 | SMNDC1      | +80 kb     | ENSG00000119953 |
| 57 | SNRNP48     | Promoter   | ENSG00000168566 |
| 58 | SREK1IP1    | Promoter   | ENSG00000153006 |
| 59 | SRSF11      | Promoter   | ENSG00000116754 |
| 60 | SRSF3       | +18 kb     | ENSG00000112081 |
| 61 | TCF7        | Intragenic | ENSG00000081059 |
| 62 | UBE2N       | Promoter   | ENSG00000177889 |
| 63 | UPF2        | Intragenic | ENSG00000151461 |
| 64 | UTP14A      | Promoter   | ENSG00000156697 |
| 65 | VEGFA       | +293 kb    | ENSG00000112715 |
