# Supplementary material for: c-Myb Binding Sites in Haematopoietic Chromatin Landscapes
Source: PubMed Central journal article supplement (PMC4514710; doi:10.1371/journal.pone.0133280), 2015-07-24
Supplement: pone.0133280.s020.pdf [file pone.0133280.s020.pdf]

**S9 Table. Overlap between suggested co-regulatory factors in K562 cells and c-Myb footprints common in all six-cell types.**

| <b>Factor</b>       | <b>c-Myb footprints common in all six cell types overlapping with ChIP-seq peaks for the factor</b> |
|---------------------|-----------------------------------------------------------------------------------------------------|
| <b>Positive set</b> |                                                                                                     |
| ETS1                | 123                                                                                                 |
| SAP30               | 101                                                                                                 |
| E2F4                | 134                                                                                                 |
| ELK1                | 64                                                                                                  |
| SIX5                | 58                                                                                                  |
| PHF8                | 204                                                                                                 |
| SIN3A               | 133                                                                                                 |
| RBBP5               | 139                                                                                                 |
| MXI1                | 116                                                                                                 |
| <b>Negative set</b> |                                                                                                     |
| THAP1               | 55                                                                                                  |
