# Supplementary material for: c-Myb Binding Sites in Haematopoietic Chromatin Landscapes
Source: PubMed Central journal article supplement (PMC4514710; doi:10.1371/journal.pone.0133280), 2015-07-24
Supplement: pone.0133280.s021.pdf [file pone.0133280.s021.pdf]

**S10 Table. List of primers used in this study.**

| <b>Primers for cloning</b> |                                         | <b>Ref.</b> |
|----------------------------|-----------------------------------------|-------------|
| DCAF7_L_F                  | cactgatgctagcaCAGACGCTACGGCCGCAATA      |             |
| DCAF7_L_R                  | tagcatgactcgagTGAGATCTATGGGTCCGAAG      |             |
| DUS3L_L_F                  | ctctgatgctagcaCACTCCTCGTTCCAAAGCT       |             |
| DUS3L_L_R                  | cagtacttctcgagTGCAGTCCAGTTCGCAATTG      |             |
| IKZF1_L_F                  | ctctgatgctagcaCACTCTGCTAAGCTACTCAA      |             |
| IKZF1_L_R                  | acactagactcgagTCCCTCCATATCCAGAGACA      |             |
| KB-1458E12.1_L_F           | ctctgatgctagcaCTGGTATCCCCACATTCTAA      |             |
| KB-1458E12.1_L_R           | cagtacttctcgagTGGACTTTGAAACGCTGCCATG    |             |
| KCHN2#1_L_F                | ctctgatgctagcaCAAAGGTAGGGCTAGAATCCA     |             |
| KCHN2#1_L_R                | cagtacttctcgagTCATGTGCCTGTCCCTAAGG      |             |
| KCNH2#2_L_F                | ctctgatgctagcaGTCCCTTCACTTGCCCCAGT      |             |
| KCNH2#2_L_R                | acgtactactcgagTGAGACTGGGAACCCTCTCC      |             |
| LMO2_L_F                   | ctctgatgctagcaCTACTTTGACCTGAGTGTGTA     |             |
| LMO2_L_R                   | acactagactcgagTACAATAAGGTCATGATTGC      |             |
| MYADM_L_F                  | ctctgatgctagcaCTCTGCACTAAACAAACCCTA     |             |
| MYADM_L_R                  | acgtacacctcgagAGAGTAAAAGTAGCGTGGAG      |             |
| C10orf55_L_F               | acttgatgctagcaCTGACATGCCCGCAGAATCCA     |             |
| C10orf55_L_R               | agatatacactcgagTGAAGAGCTGGAGCCTCAGG     |             |
| RABEPK_L_F                 | ctctgatgctagcaAGCCTGTTCTTTCCCGACC       |             |
| RABEPK_L_R                 | cagacgatctcgagTGGACCTGGCATGGAGTAG       |             |
| RUNX2_L_F                  | ctctgatgctagcaCACCTCTTCTGTCTTGTAACA     |             |
| RUNX2_L_R                  | cagtacttctcgagTGAGCTAAAAGCGACGAATAAG    |             |
| SENPI_L_F                  | acttgatgctagcaGACACAGTCTCCTGGACCA       |             |
| SENPI_L_R                  | acactagactcgagCAGACTGAAAAGGGTACTGAG     |             |
| Control#1_L_F              | ctctgatgctagcaCTGGTATGATAGAACTGTCC      |             |
| Control#1_L_R              | cagtacttctcgagTATGAAAGAGCAAAGCAAGG      |             |
| GRSF1_L_F                  | ctctgatgctagcaATAGAGCCAGCGGGCGGAGTA     |             |
| GRSF1_L_R                  | TCTCCACCTCCTTCCGACTC                    |             |
| RUNX1#1_L_F                | ctctgatgctagcaTAACTGTCACCAAGGGCTGGGA    |             |
| RUNX1#1_L_R                | cagacgatctcgagATGCAAAAAGAAGTTCAAAGGCTGA |             |
|                            |                                         |             |
| <b>Primers for DamID</b>   |                                         |             |
| IKZF1_F                    | CTGGTATCTCGCGGGCGGCTTCC                 |             |
| IKZF1_R                    | ACACTGTGCTTGTGTGTCATC                   |             |
| PA2G4_F                    | CTCAGCGTTCTCGGTGGAAGT                   |             |
| PA2G4_R                    | CGGAATCGCCGGGCACTCTG                    | [1]         |
| RUNX1_F                    | GATACAGCAAGGTCGTTGCTCA                  |             |
| RUNX1_R                    | ACCCAGGAAACACCTTGCAGAG                  |             |
| MYADM_F                    | GCTGTTGTGTCTTCTGTTTTGT                  |             |
| MYADM_R                    | CGCCCCCAGAGTAAAAGT                      |             |
| LMO2_F                     | CTGCATATGACTTTGGGTCA                    |             |
| LMO2_R                     | GAATGAAATCCCACCGGTAG                    |             |

|             |                       |     |
|-------------|-----------------------|-----|
| KCHN2_F     | CACAATACTGACCATCGGAC  |     |
| KCHN2_R     | AGTTGGGAGAGGATGACATT  |     |
| CBFA2T3_F   | CACTCCCCACCTCCCCACTA  |     |
| CBFA2T3_R   | CTGAAAGCCACAGCCAACGTC |     |
| BHLHE40_F   | CCCTTTCCAACCCAGTCCTT  |     |
| BHLHE40_T   | GGTTCTCGCCTCATTTCAT   |     |
| Control#1_F | CCTGGTATGCACCAACACAG  | [2] |
| Control#1_R | TTCAGGAGTCTGGGGATTTG  | [2] |
| Control#2_F | CATGACACTAGTTGTGCTGTG |     |
| Control#2_R | CTGTCCTATGTTGGCTCAGAT |     |
| GRSF1_F     | ATAGAGCCAGCGGCGGAGTA  |     |
| GRSF1_R     | CAACCGGCCCTGGATTCCAC  |     |

### Reference:

1. Zhao L, Glazov EA, Pattabiraman DR, Al-Owaidi F, Zhang P, et al. (2011) Integrated genome-wide chromatin occupancy and expression analyses identify key myeloid pro-differentiation transcription factors repressed by Myb. *Nucleic Acids Res* 39: 4664–4679. doi:10.1093/nar/gkr024.
2. Barski A, Cuddapah S, Cui K, Roh T-Y, Schones DE, et al. (2007) High-resolution profiling of histone methylations in the human genome. *Cell* 129: 823–837. doi:10.1016/j.cell.2007.05.009.
