# Supplementary material for: c-Myb Binding Sites in Haematopoietic Chromatin Landscapes
Source: PubMed Central journal article supplement (PMC4514710; doi:10.1371/journal.pone.0133280), 2015-07-24
Supplement: pone.0133280.s022.pdf [file pone.0133280.s022.pdf]

**S11 Table. Antibodies used in this study.**

| <b>Antibody</b>                                                          | <b>Dilution for Western analysis</b> |
|--------------------------------------------------------------------------|--------------------------------------|
| Anti-FLAG M2 antibody (mouse, monoclonal) (F3165)<br>(Sigma-Aldrich)     | 1:5000                               |
| Anti-c-Myb antibody (rabbit, polyclonal) (H-141)<br>(Santa Cruz Biotech) | 1:200                                |
| Anti-Gapdh antibody (mouse, monoclonal) (AM4300)<br>(Invitrogen)         | 1:10000                              |
